# Supplementary material
Source: PubMed Central journal article supplement (PMC7440768)

**Supplemental figure 1. Washing cells before infection reduces but does not remove MUC2 layer.** To understand if the height of the MUC2 layer restricted bacterial adherence, we washed the colonoid monolayers before EAEC infection. Samples were fixed with methanol:acetic acid and stained for MUC2 (red) and DNA (blue). Representative images are shown. An unpaired t-test was performed,  $p=0.0227$ .

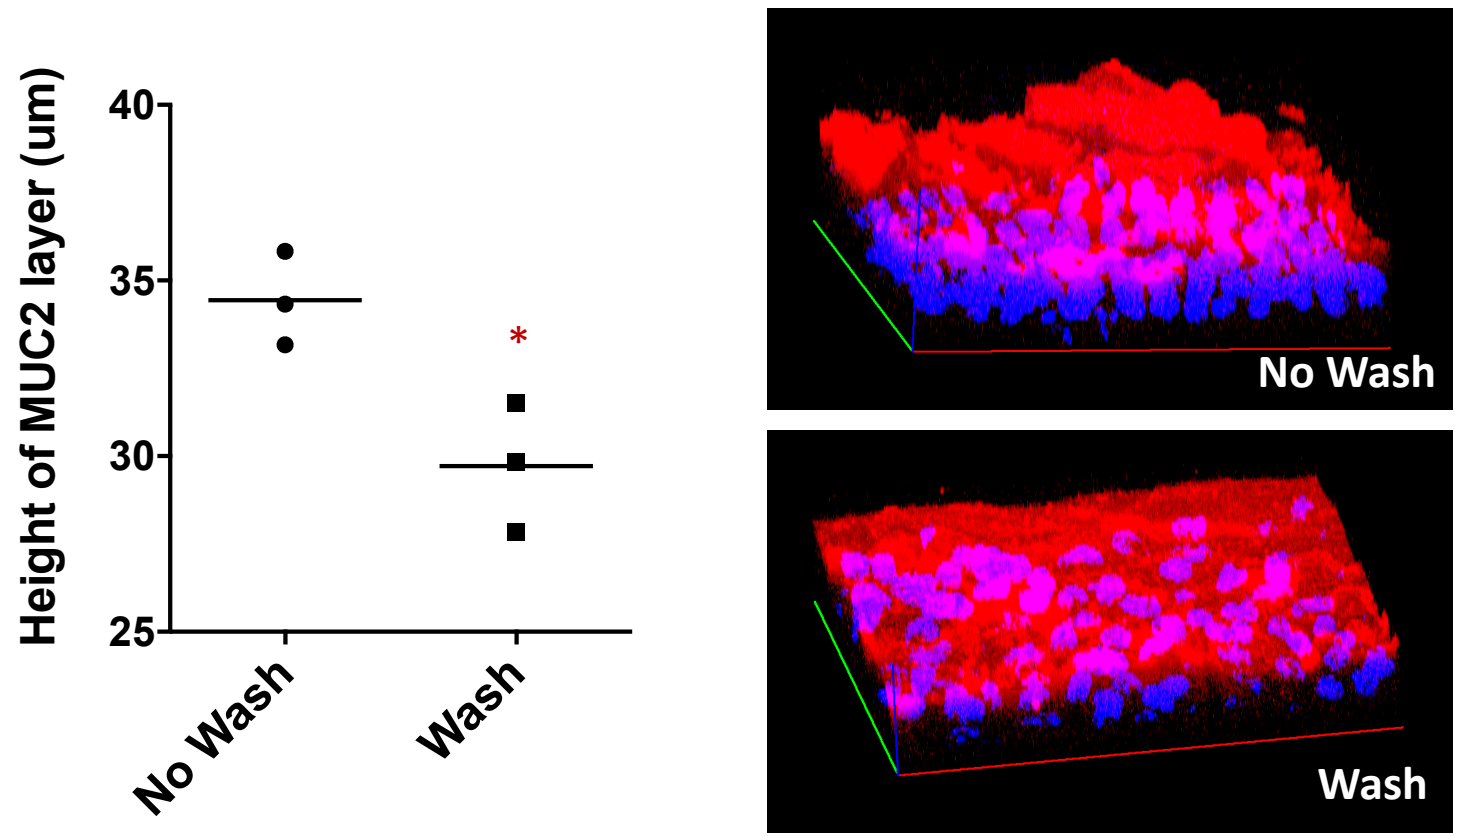

Supplement: IAI.00176-20-s0001.pdf [file IAI.00176-20-s0001.pdf]
