# Supplementary material
Source: PubMed Central journal article supplement (PMC7440768)

## Supplemental figure 2. Media collected after colonoid culture is toxic to EAEC.

To determine whether bacterial growth was inhibited by an unknown factor or factors produced by the colonoids, we collected and filtered spent apical media from colonoid monolayers seeded on Transwell supports (lines 70C and 75C) derived from two different donors after 2 days of colonoid growth (in the absence of bacteria). We then incubated WT EAEC with spent or fresh media for 6 h and measured bacterial proliferation. To compensate for differences in nutritional content, spent media was diluted 1:2 with fresh media. As a control, fresh media was diluted 1:2 with sterile PBS.

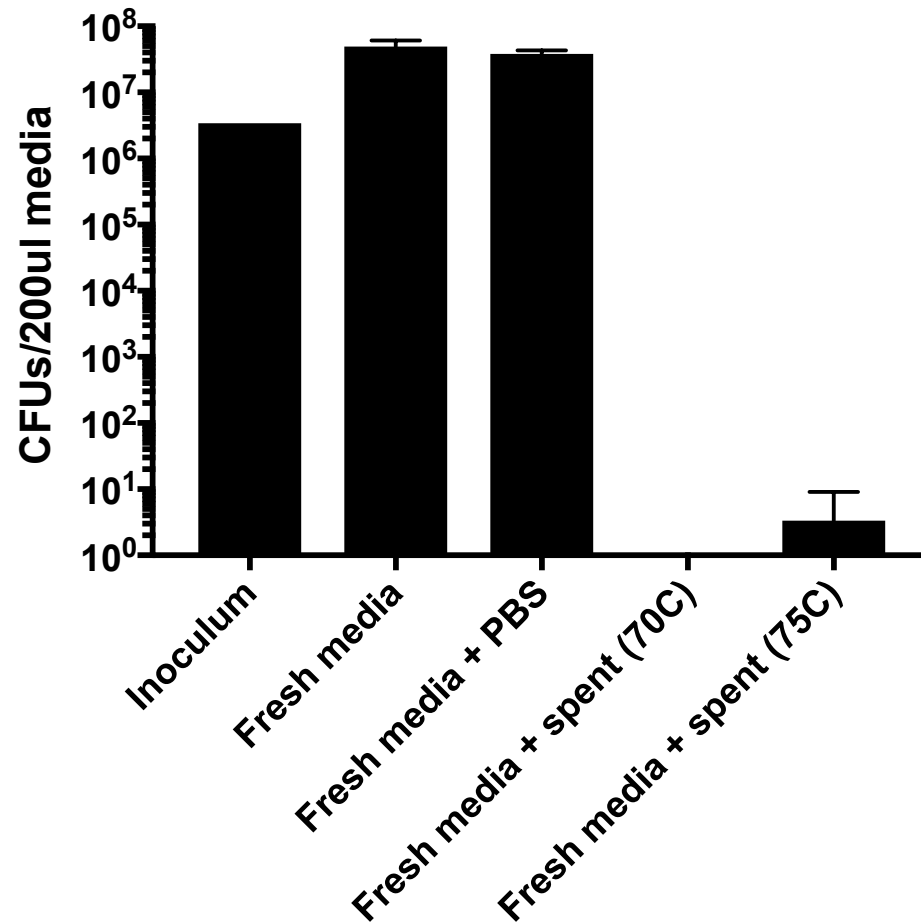

Supplement: IAI.00176-20-s0002.pdf [file IAI.00176-20-s0002.pdf]
