# Supplementary material
Source: PubMed Central journal article supplement (PMC7440768)
Supplement: IAI.00176-20-s0003.pdf [file IAI.00176-20-s0003.pdf]

**Supplemental figure 3. MUC2 staining was not detected in samples fixed with paraformaldehyde.** Colonoids (75C) were infected for 3 h with WT EAEC strain 042. We probed MUC2 staining in samples fixed with paraformaldehyde (left) or methanol:acetic acid (right). Samples were stained for MUC2 (red), AafA (rabbit polyclonal, green, detects EAEC) and DNA (blue). Representative images are shown.

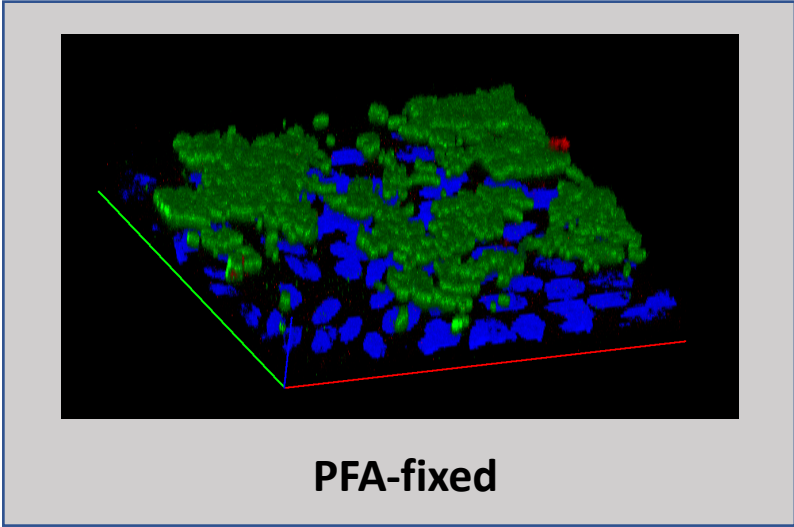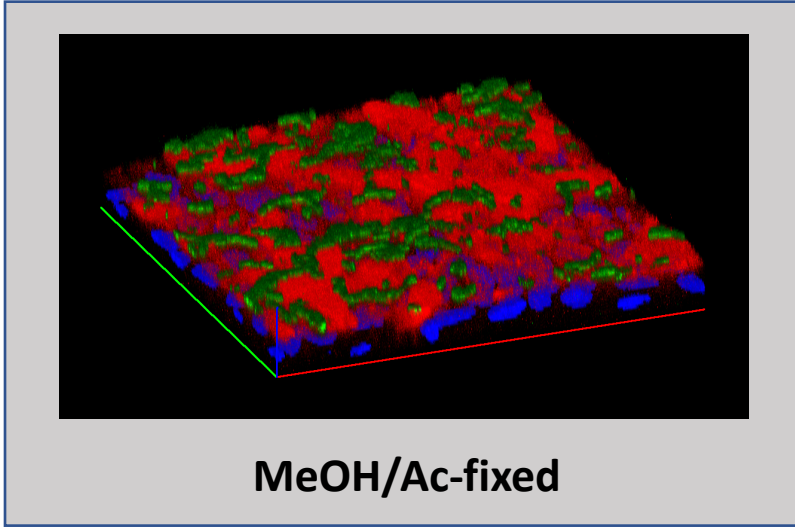

AafA  
MUC2  
DNA
